# Supplementary material
Source: PubMed Central journal article supplement (PMC9974838)

## S1 | APPENDIX: ADDITIONAL FIGURES AND TABLES

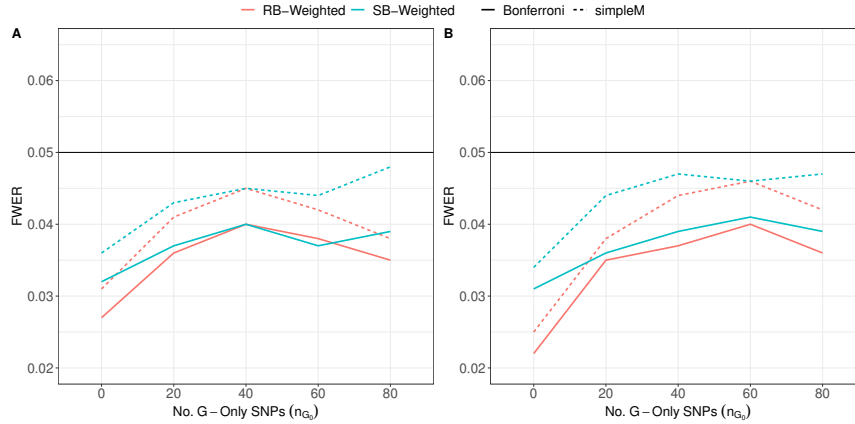

**FIGURE S1** Estimated FWER when  $n_G$   $G$ -only effects are present ( $n_G \in \{10, 20, 40, 80\}$ ) each explaining  $R_G^2 \times 100\%$  of the variation in the quantitative trait. RB-Weighted: Rank-based two-step weighted testing with initial bin size 5 in Step 1; SB-Weighted: Significance-based weighted hypothesis testing with  $\tau = (0, 5/25000, 15/25000, \dots, 1)$  as the  $p$ -value cutoffs in Step 1. Bonferroni: Standard Bonferroni correction within bin; simpleM: The simpleM procedure proposed by Gao et al. (2008) with  $C = 0.995$ . Results are averaged over 5000 simulations. Panel A:  $R_{G_{25}}^2 = R_{G_{25} \times E}^2 = R_G^2 = 0.01$ ,  $R_E^2 = 0.005$ ,  $N = 2,000$ ; Panel B:  $R_{G_{25}}^2 = R_{G_{25} \times E}^2 = R_G^2 = 0.005$ ,  $R_E^2 = 0.0025$ ,  $N = 4,000$ .

**TABLE S1** Estimated FWER when  $n_G$   $G$ -only effects are present ( $n_G \in \{10, 20, 40, 80\}$ ) and the total amount of variation explained is fixed at 40% ( $R_G^2 = 0.4/n_G$ ). RB-Weighted: Rank-based weighted hypothesis testing proposed by Ionita-Laza et al. (2007) with  $B_0 = 5$ ; SB-Weighted: Our proposed significance-based weighted hypothesis testing with  $\tau = (0, 5/25000, 15/25000, \dots, 1)$  as the  $p$ -value cutoffs. Bonferroni: Standard Bonferroni correction within bin; simpleM: The simpleM procedure proposed by Gao et al. (2008) with  $C = 0.995$ . Results are averaged over 5000 simulations.

| $n_G =$            | 10    | 20    | 40    | 80    |
|--------------------|-------|-------|-------|-------|
| $R_G^2 =$          | 0.04  | 0.02  | 0.01  | 0.005 |
| <b>RB-Weighted</b> |       |       |       |       |
| Bonferroni         | 0.044 | 0.040 | 0.035 | 0.036 |
| simpleM            | 0.045 | 0.045 | 0.039 | 0.039 |
| <b>SB-Weighted</b> |       |       |       |       |
| Bonferroni         | 0.037 | 0.037 | 0.036 | 0.036 |
| simpleM            | 0.045 | 0.045 | 0.043 | 0.044 |

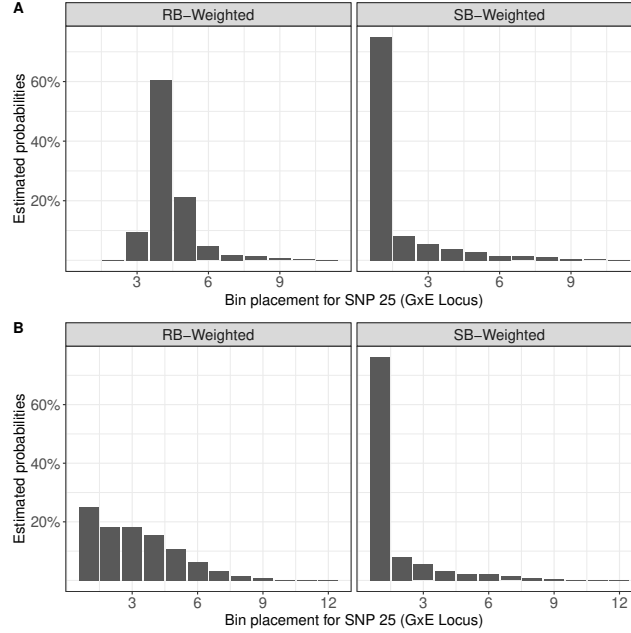

**FIGURE S2** Bar chart of bin placement for the 25th SNP (i.e.  $G \times E$  locus) in Step 1 over 5,000 simulations. RB-Weighted: Rank-based weighted hypothesis testing using with initial bin size  $B_0$  in Step 1; SB-Weighted: Significance-based weighted hypothesis testing using  $\tau = (0, B_0/25000, 3B_0/25000, \dots, 1)$  as the  $p$ -value cutoffs in Step 1. Simulation parameters:  $R_{G_{25}}^2 = R_{G_{25} \times E}^2$ ,  $R_E^2 = 0.005$ ,  $N = 2,000$ ,  $M = 25,000$ . Panel A)  $n_G = 10$   $G$ -only SNPs each with  $R_G^2 = 0.04$ ; Panel B:  $n_G = 80$   $G$ -only SNPs each with  $R_G^2 = 0.005$ .

## S2 | APPENDIX: SIMULATION SETUP

Let  $\mathbf{G}$  be an  $N \times M$  genotype matrix for  $N$  individuals and  $M$  SNPs. We partition the  $M$  SNPs into blocks of 50 SNPs such that  $\mathbf{G} = [\mathbf{G}_1, \mathbf{G}_2, \dots]$  where  $\mathbf{G}_j$  is the  $j$ th block of  $N \times 50$  SNPs. Each  $\mathbf{G}_j$  is simulated based on sampled minor allele frequencies (MAFs) and LD-matrices from the 1000 Genomes Project. For clarity, we denote  $G_j$  as the  $j$ th SNP and  $\mathbf{G}_j$  as the  $j$ th block. Quantitative traits are simulated according to the following linear model:

$$Y = \beta_{G_{25}} G_{25} + \beta_E E + \beta_{G_{25} \times E} (G_{25} \times E) + \sum_{j \in \mathcal{G}} \beta_{G_j} G_j + \epsilon,$$

where  $\epsilon \sim \mathcal{N}(\mathbf{0}, \sigma_\epsilon^2 I)$  for some  $\sigma_\epsilon^2 > 0$ ,  $E$  is the exposure variable (assumed to be binary) with  $\Pr(E = 1) = 0.3$  and  $\mathcal{G}$  corresponds to the set of SNPs that are only marginally associated with the outcome but have no  $G \times E$  effect ( $G$ -only loci). By construction, the 25th SNP within block 1 ( $\mathbf{G}_1$ ) has a true  $G \times E$  effect on the outcome (i.e. the  $G \times E$  locus).  $\sigma_\epsilon^2$  was chosen to explain the remaining variance in the outcome after accounting for the variance explained by the causal  $G \times E$  locus, the exposure, and the  $G$ -only loci across the different scenarios outlined in the main text.

The  $M = 25,000$  genotypes are simulated in blocks ( $\mathbf{G} = [\mathbf{G}_1, \mathbf{G}_2, \dots, \mathbf{G}_{500}]$ ) such that each block consists of 50 SNPs drawn from a mean zero multivariate normal distribution with variance-covariance matrix based on the LD pattern derived from a sampled region of the 1000 Genomes Project. The normal variates are then trichotomized into genotypes based on the 1000 Genomes Project derived MAFs assuming Hardy-Weinberg equilibrium. Thus, genotypes are correlated within a block but independent across blocks. Define  $\mathbf{V} = [\mathbf{V}_1, \dots, \mathbf{V}_{500}]$  and  $\mathbf{f} = (\mathbf{f}_1, \dots, \mathbf{f}_{500})$ , where  $\mathbf{V}_j$  is a  $50 \times 50$  LD matrix and  $\mathbf{f}_j$  is the corresponding vector of minor allele frequencies (MAF) of the 50 SNPs for  $j = 1, \dots, 500$ . Both  $\mathbf{V}_j$  and  $\mathbf{f}_j$  are derived from a randomly sampled region from the 1000 Genomes Project. To avoid storing 500 unique values of  $\mathbf{V}_j$  and  $\mathbf{f}_j$ , we only store 50 unique values (randomly sampled regions), and recycled them such that the  $(\mathbf{V}_1, \mathbf{f}_1) = (\mathbf{V}_{51}, \mathbf{f}_{51}) = (\mathbf{V}_{101}, \mathbf{f}_{101}), \dots, (\mathbf{V}_2, \mathbf{f}_2) = (\mathbf{V}_{52}, \mathbf{f}_{52}) = (\mathbf{V}_{102}, \mathbf{f}_{102}), \dots, (\mathbf{V}_3, \mathbf{f}_3) = (\mathbf{V}_{53}, \mathbf{f}_{53}) = (\mathbf{V}_{103}, \mathbf{f}_{103}), \dots$

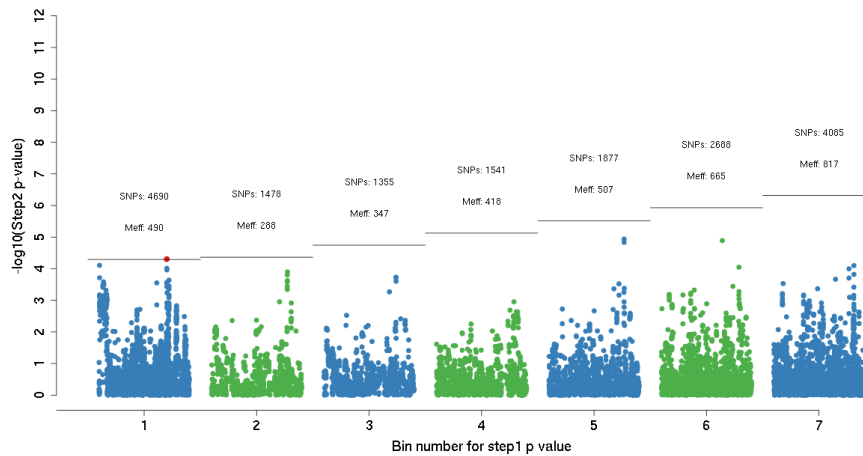

**FIGURE S3** Results from the supplemental  $G$ -by-sex interaction scan using the SB-weighted testing approach applied to the FIGI consortium data ( $N = 89,304$ ,  $M = 7,809,725$ ) with relaxed bin thresholding. x-axis: Bins are based on the marginal outcome-gene association statistic (e.g. SNPs that have a Step 1 statistic  $< 15/M$  are included in bin 1). y-axis:  $p$ -value of the  $G \times E$  association provided by the GWIS (on the  $-\log_{10}$  scale). Number of SNPs in each bin as well as the effective number of independent SNPs (Meff) using the simple  $M$  approach are included. Horizontal line indicates the threshold the Step 2  $p$ -value must cross to be statistically significant, maintaining the overall FWER=0.05. Only SNPs in the first 7 bins are shown in this figure.

To simulate allelic dosages, first let  $\mathbf{X} = [\mathbf{X}_1, \mathbf{X}_2, \dots, \mathbf{X}_{500}] \sim \mathcal{N}(\mathbf{0}, \mathbf{V})$  be a  $N \times M$  matrix of mean zero normal variates with block correlation structure  $\mathbf{V}$ . Letting  $G_{i,k}$  and  $X_{i,k}$  be the  $i$ th row of the  $k$ th column of  $\mathbf{G}$  and  $\mathbf{X}$  ( $i = 1, \dots, N$ ;  $k = 1, \dots, M$ ), respectively, and  $f_k$  being the  $k$ th element of  $\mathbf{f}$ ,

$$G_{i,k} = \begin{cases} 0 & \text{if } X_{i,k} < \Phi(f_k^2) \\ 1 & \text{if } \Phi(f_k^2) \leq X_{i,k} < \Phi(f_k^2 + 2f_k(1-f_k)) \\ 2 & \text{if } \Phi(f_k^2 + 2f_k(1-f_k)) \leq X_{i,k} \end{cases}$$

where  $\Phi(\cdot)$  is the cumulative distribution function of the standard normal distribution.

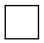

Supplement: NIHMS1858065-supplement-1.pdf [file NIHMS1858065-supplement-1.pdf]
